# Supplementary material for: Biotransformation of graphene oxide nanosheets in blood plasma affects their interactions with cells
Source: Royal Society of Chemistry journal article supplement (doi:10.1039/c7en00328e), 2017-01-01
Supplement: c7en00328e1.pdf [file c7en00328e1.pdf]

**Supporting information for publication**

**Biotransformation of graphene oxide nanosheets in blood plasma affects their interactions with cells**

Xiangang Hu,<sup>\*a</sup> Dandan Li,<sup>a</sup> and Li Mu<sup>b</sup>

*<sup>a</sup>Key Laboratory of Pollution Processes and Environmental Criteria (Ministry of Education), Tianjin Key Laboratory of Environmental Remediation and Pollution Control, College of Environmental Science and Engineering, Nankai University, Tianjin 300071, China.*

*<sup>b</sup>Institute of Agro-environmental Protection, Ministry of Agriculture, Tianjin 300191, China.*

\*Corresponding author at: College of Environmental Science and Engineering, Nankai University, Tianjin 300071, China. E-mail address: huxiangang@nankai.edu.cn (X.G. Hu)

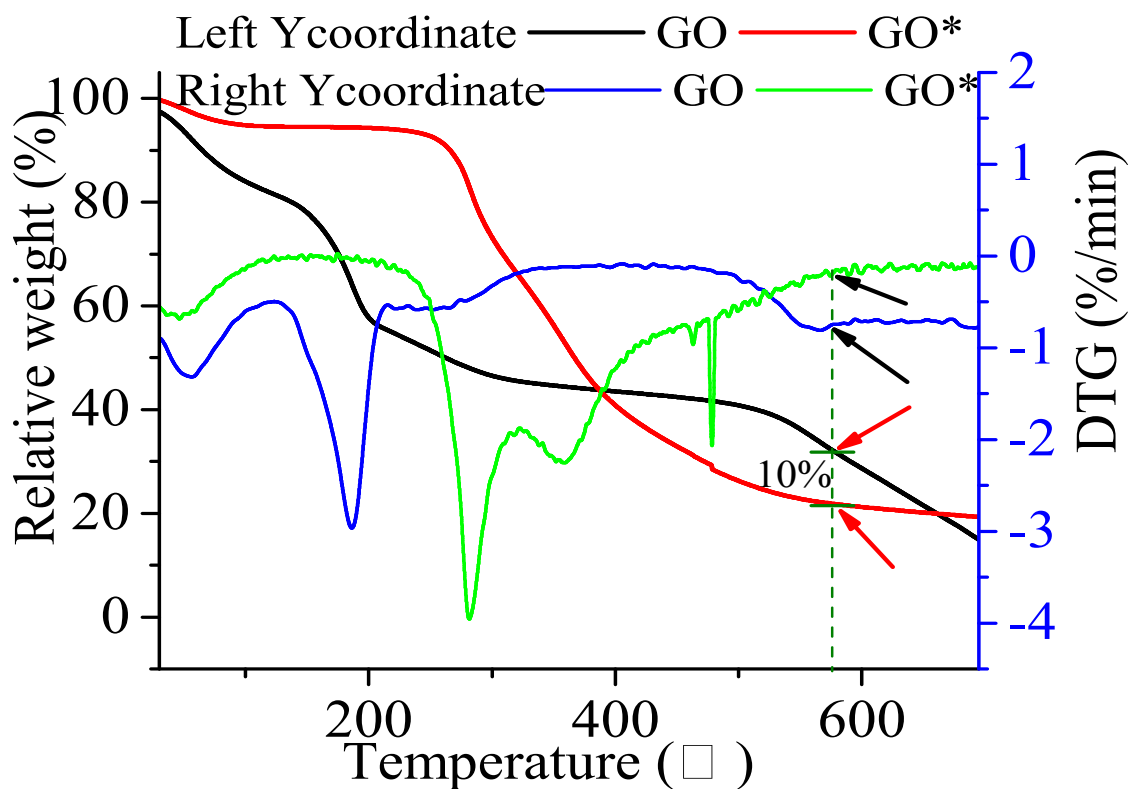

**Fig. S1** Thermogravimetric analysis curves of pristine graphene oxide (GO) and GO biotransformed (GO\*) in blood plasma after a 14-day reaction. The black and red arrows on the relative weight loss and differential thermal gravity (DTG) curves, respectively, denote the temperature (570°C) at which the graphene structure decomposed.

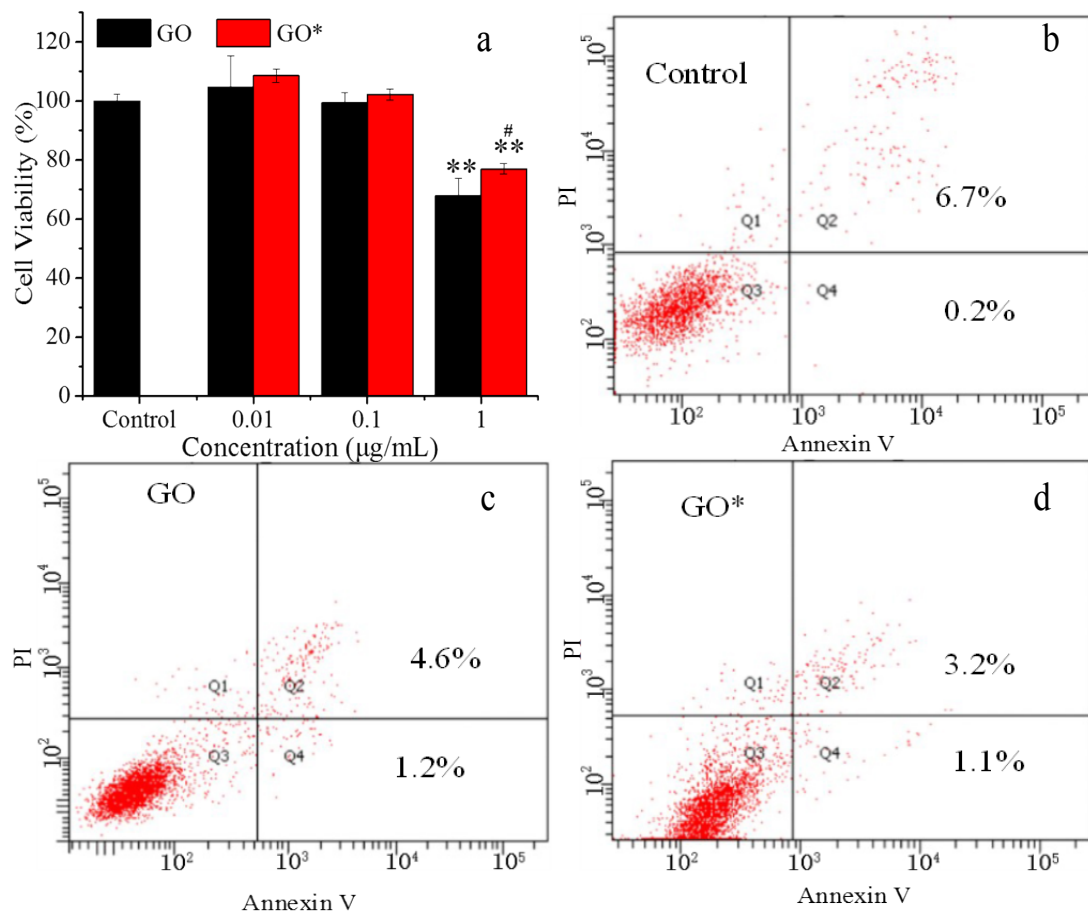

**Fig. S2** Cell viability and apoptosis influenced by pristine GO and biotransformed GO (GO\*). (a) Cell viability as detected by a lactate dehydrogenase assay; (b-d) apoptosis in the control, GO and GO\* groups as detected by flow cytometry. For the flow cytometry images of the exposure groups, the tested concentration was 0.1 µg/ml. \*\* $p < 0.01$  represents the significant level for GO or GO\* cultured cells vs control cells. # $p < 0.05$  represents the significant level for GO\* vs GO cultured cells.

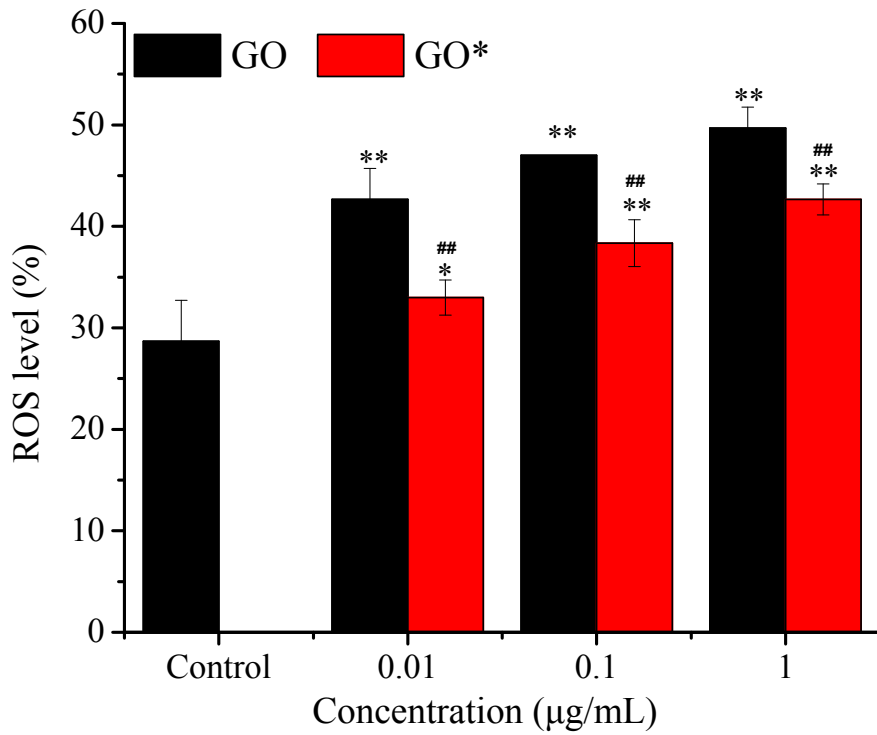

**Fig. S3** Reactive oxygen species (ROS) generation induced in human embryonic lung fibroblasts by pristine graphene oxide (GO) and biotransformed GO (GO\*). \* $p < 0.05$  and \*\* $p < 0.01$  represent the significant levels for GO or GO\* group vs control group. ## $p < 0.01$  represents the significant level for GO\* group vs GO group.

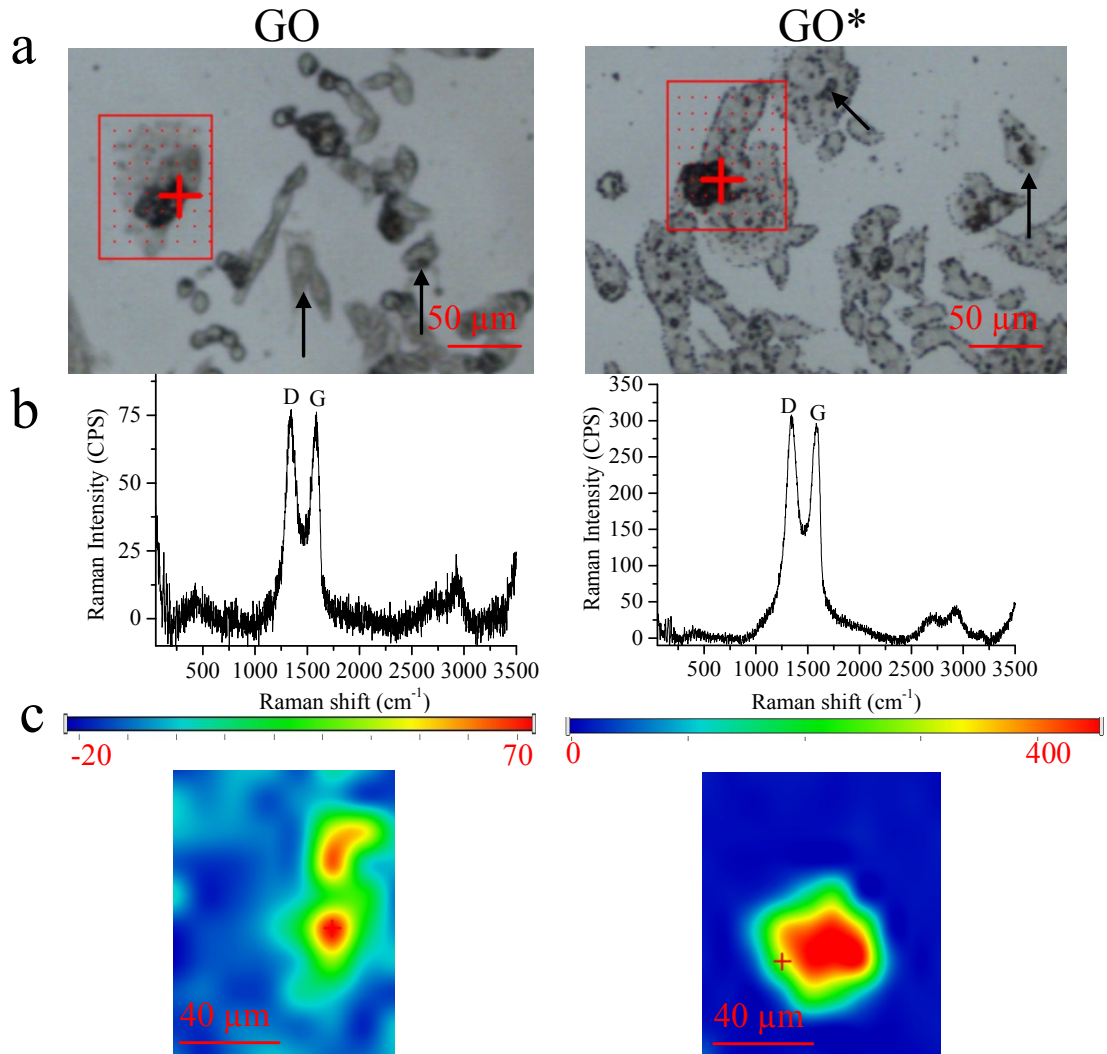

**Fig. S4** Confocal Raman imaging results showing the uptake of pristine graphene oxide (GO) (left) and biotransformed GO (right). (a) Bright-field imaging of human embryonic lung fibroblasts; the red box denotes the scanning area; (b) Raman spectrum of cells from the location of the plus sign in (a); (c) the scanning image at 1557 cm<sup>-1</sup> for the area denoted by the red box in (a). In (b), the Raman bands at 1557 cm<sup>-1</sup> and 1373 cm<sup>-1</sup> denote the *sp*<sup>2</sup> and *sp*<sup>3</sup> GO structures, respectively. In (c), blue and red denote the cell matrix and GO-based aggregates, respectively.

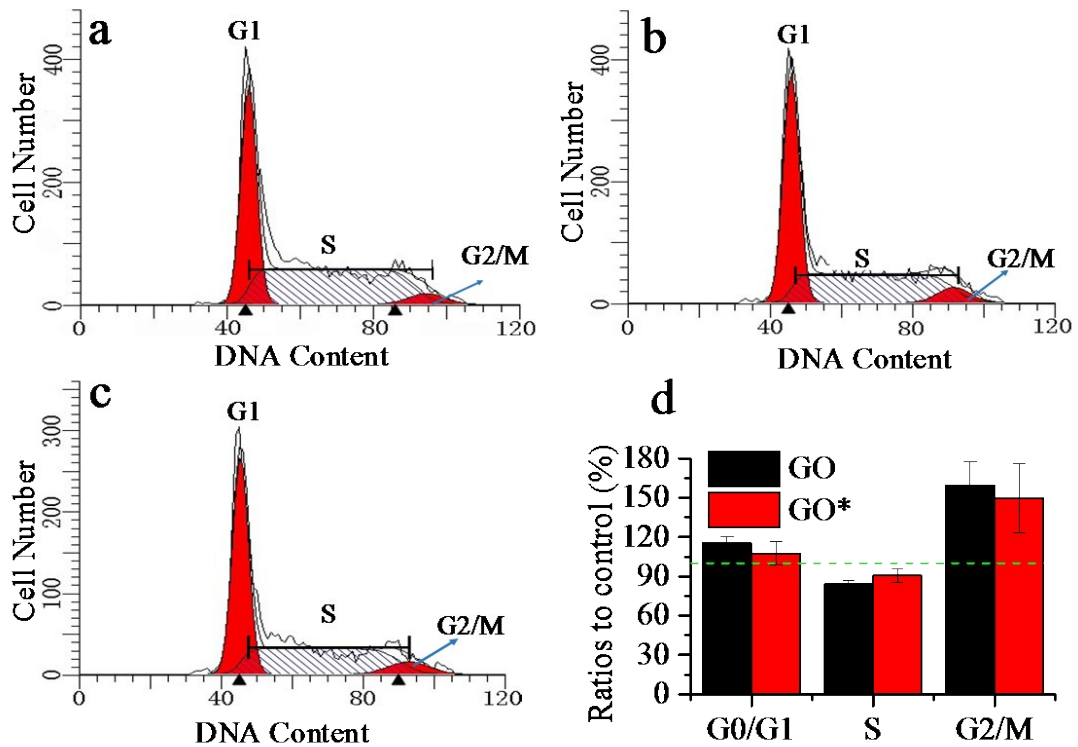

**Fig. S5** Cell cycle arrest of human embryonic lung fibroblasts induced by pristine graphene oxide (GO) and biotransformed GO (GO\*). (a) Cell cycle phase in the control group; (b) cell cycle phase in the pristine graphene oxide (GO) group (1  $\mu\text{g}/\text{ml}$ ); (c) cell cycle phase in the biotransformed GO group (1  $\mu\text{g}/\text{ml}$ ); (d) the cell cycle phase ratio of the exposure groups relative to that of the control group (the yellow line indicates a cutoff of 100%).

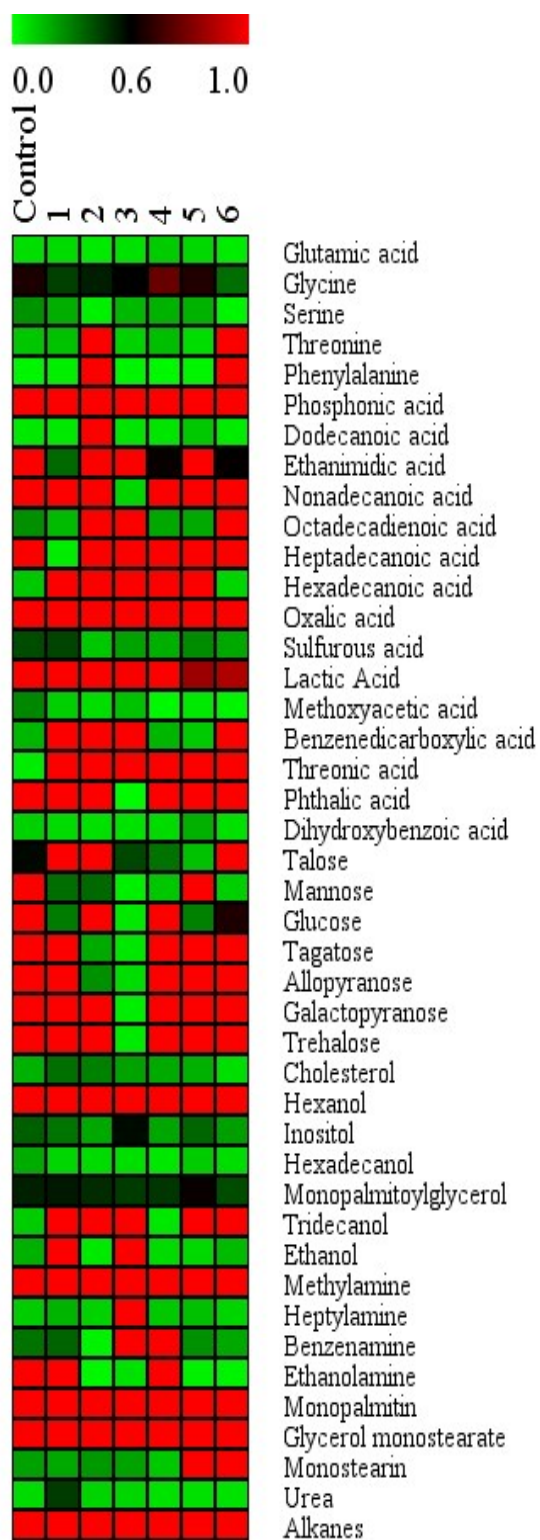

**Fig. S6** Heat map representing the relative abundance of metabolites. The numbers 1-3 represent pristine graphene oxide (GO) at 0.01, 0.1 and 1  $\mu\text{g}/\text{ml}$ , respectively.

The numbers 4-6 represent biotransformed GO at 0.01, 0.1 and 1  $\mu\text{g}/\text{ml}$ , respectively.

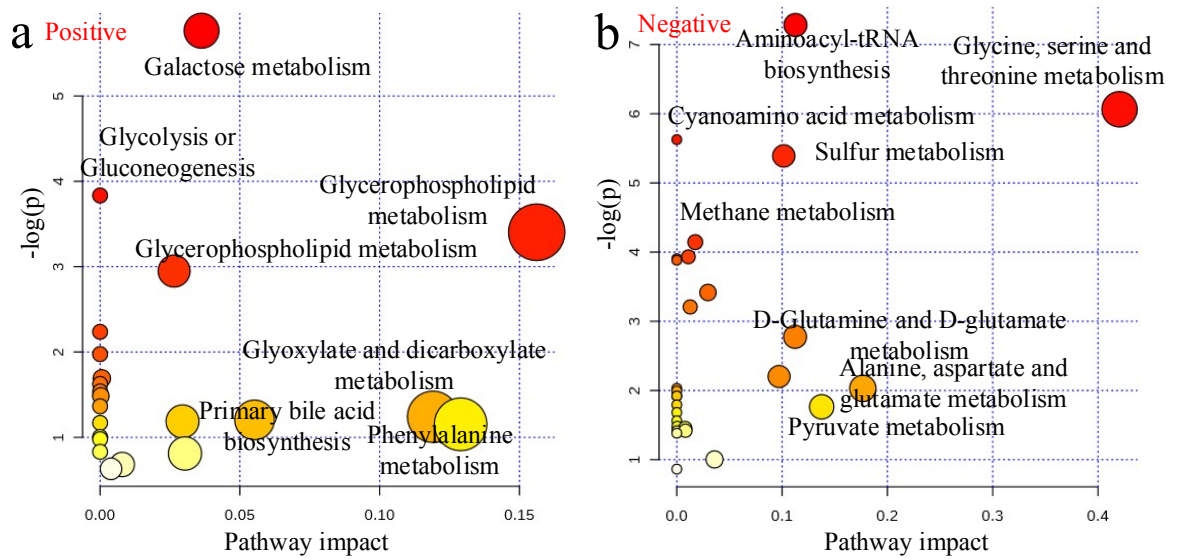

**Fig. S7.** Connections between metabolic pathways and reactive oxygen species (ROS) levels. (a) Metabolic pathways positively related to ROS levels; (b) metabolic pathways negatively related to ROS levels.



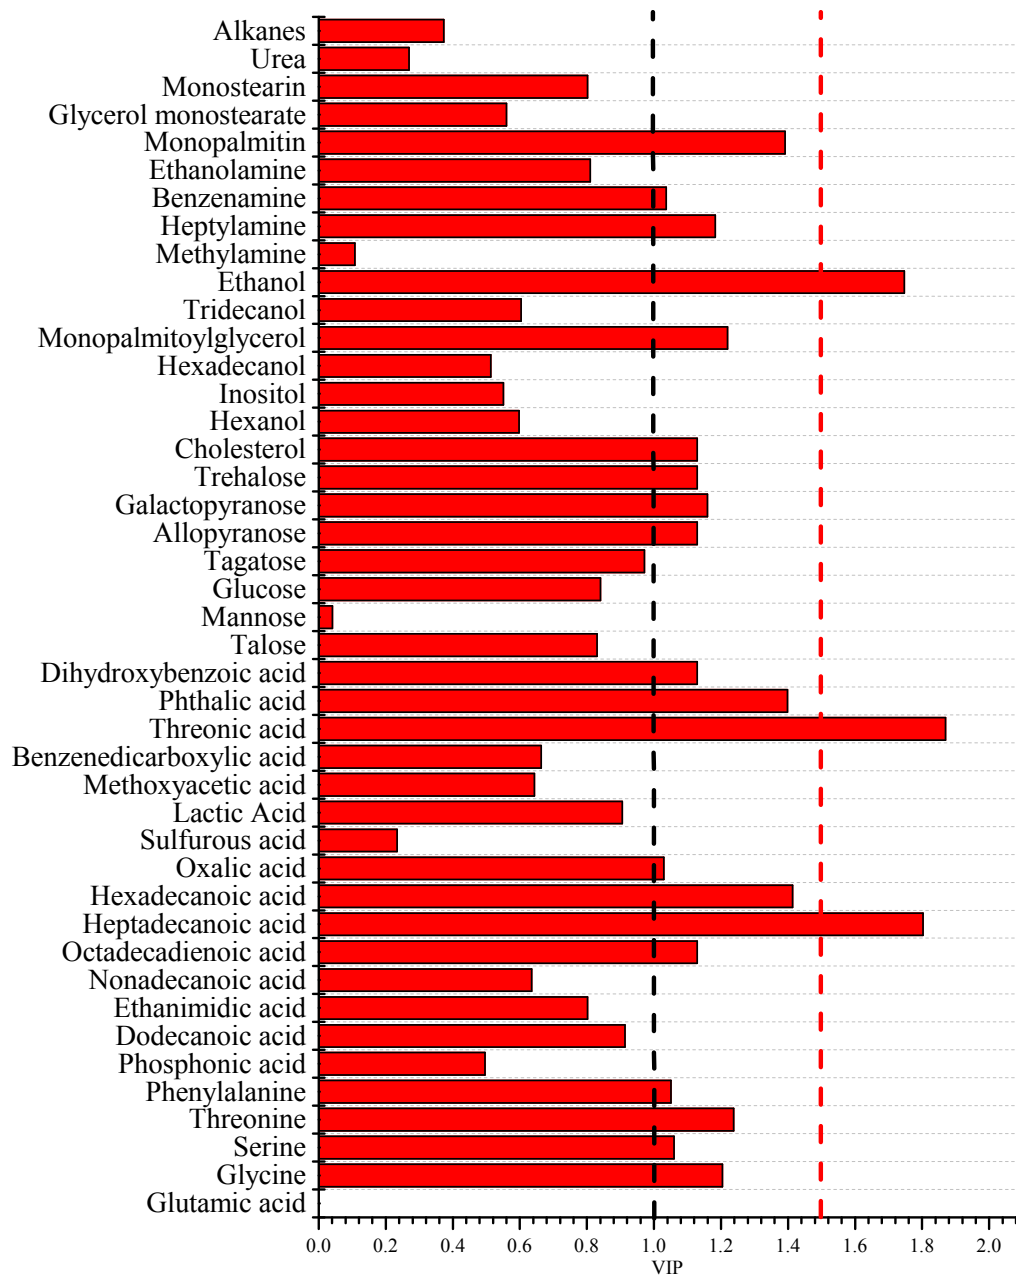

**Fig. S8** Variable importance in the projection (VIP) from the orthogonal partial least squares discriminant analysis using SIMCA-P 11.5 software. Reactive oxygen species level is the Y variable, and the abundance of metabolites is the X variable. The black and red dotted lines indicate VIP values of 1 and 1.5, respectively.
